# Supplementary material
Source: PubMed Central journal article supplement (PMC7193518)
Supplement: jamaotolaryngolheadnecksurg-e200530-s001.pdf [file jamaotolaryngolheadnecksurg-e200530-s001.pdf]

## Supplementary Online Content

Piersiala K, Akst LM, Hillel AT, Best SR. Chronic pain syndromes and their laryngeal manifestations. *JAMA Otolaryngol Head Neck Surg*. Published online April 30, 2020. doi:10.1001/jamaoto.2020.0530

**eTable 1.** Odds of Voice Laryngeal Disorders in Patients With Chronic Syndromes vs Control Group

**eTable 2.** Odds of Voice Laryngeal Disorders in Patients With Fibromyalgia vs Control Group

**eTable 3.** Odds of Voice Laryngeal Disorders in Patients With Irritable Bowel Syndrome vs Control Group

**eTable 4.** Odds of Voice Laryngeal Disorders in Patients With Chronic Fatigue Syndrome vs Control Group

This supplementary material has been provided by the authors to give readers additional information about their work.

**eTable 2.** Odds of Voice Laryngeal Disorders in Patients With Chronic Syndromes vs Control Group

| Diagnosis                         | Chronic pain syndromes group (215) | Control group (4035) | Unadjusted OR | 95% CI      | Adjusted OR <sup>#</sup> | 95% CI       |
|-----------------------------------|------------------------------------|----------------------|---------------|-------------|--------------------------|--------------|
| <b>Vocal cords pathology</b>      | <b>103 (30.9)<sup>+</sup></b>      | <b>2241 (36.7)</b>   | 0.774         | 0.610-0.982 | 0.808                    | 0.635-1.028  |
| VC cancer                         | 2 (0.9) <sup>++</sup>              | 150 (3.7)            | 0.240         | 0.059-0.973 | 0.330                    | 0.081-1.348  |
| Chronic Laryngitis                | 11 (5.1)                           | 178 (4.4)            | 1.139         | 0.613-2.115 | 1.126                    | 0.604-2.101  |
| Phonotraumatic injury             | 11 (5.1)                           | 275 (6.8)            | 0.725         | 0.393-1.339 | 0.697                    | 0.375-1.295  |
| VC granuloma                      | 8 (3.7)                            | 98 (2.4)             | 1.511         | 0.728-3.132 | 2.088                    | 0.994-4.386  |
| VC paralysis                      | 11 (5.1)                           | 456 (11.3)           | 0.424         | 0.231-0.779 | 0.407                    | 0.221-0.751  |
| VC paresis                        | 12 (5.6)                           | 162 (4.0)            | 1.373         | 0.756-2.494 | 1.498                    | 0.820-2.738  |
| VC cyst                           | 4 (1.9)                            | 49 (1.2)             | 1.504         | 0.540-4.194 | 1.386                    | 0.494-3.893  |
| VC leukoplakia                    | -                                  | 54 (1.3)             | -             | -           | -                        | -            |
| VC dysplasia                      | -                                  | 45 (1.1)             | -             | -           | -                        | -            |
| Presbyphonia                      | 13 (6.0)                           | 202 (5.0)            | 1.183         | 0.667-2.095 | 1.302                    | 0.721-2.352  |
| Fungal Laryngitis                 | -                                  | 23 (0.6)             | -             | -           | -                        | -            |
| Laryngeal Papilloma               | 2 (0.9)                            | 94 (2.3)             | 0.387         | 0.095-1.576 | 0.539                    | 0.131-2.212  |
| Reinke's edema                    | 4 (1.9)                            | 82 (2.0)             | 0.894         | 0.326-2.454 | 0.693                    | 0.252-1.908  |
| Inflammatory VC lesion            | 3 (1.4)                            | 20 (0.5)             | 2.769         | 0.819-9.366 | 2.498                    | 0.730-8.548  |
| Ulcerative Laryngitis             | 2 (0.9)                            | 31(0.8)              | 1.185         | 0.282-4.974 | 1.157                    | 0.273-4.896  |
| Glottic Webbing                   | -                                  | 14 (0.3)             | -             | -           | -                        | -            |
| VC scar/sulcus                    | 7 (3.3)                            | 105 (2.6)            | 1.217         | 0.562-2.635 | 1.413                    | 0.647-3.084  |
| non-SCC VC cancer                 | -                                  | 10 (0.2)             | -             | -           | -                        | -            |
| Laryngocele                       | 1 (0.5)                            | 3 (0.1)              | 6.134         | 0.636-59.12 | 5.253                    | 0.524-52.647 |
| Spasmodic Dysphonia               | 4 (1.9)                            | 94 (2.3)             | 0.778         | 0.284-2.130 | 0.631                    | 0.229-1.736  |
| Dysarthria                        | 3 (1.4)                            | 34 (0.8)             | 1.625         | 0.497-5.319 | 1.442                    | 0.437-4.761  |
| Dystonia                          | 2 (0.9)                            | 41 (1.0)             | 0.895         | 0.215-3.715 | 0.741                    | 0.177-3.103  |
| Laryngeal tremor                  | 3 (1.4)                            | 19 (0.5)             | 2.915         | 0.858-9.901 | 1.875                    | 0.548-6.422  |
| <b>Functional Voice disorders</b> | <b>80 (24.0)</b>                   | <b>908 (14.9)</b>    | 1.812         | 1.396-2.353 | 1.679                    | 1.290-2.185  |

|                                                 |                  |                    |       |              |       |              |
|-------------------------------------------------|------------------|--------------------|-------|--------------|-------|--------------|
| Muscle Tension Dysphonia                        | 66 (30.7)        | 709 (17.6)         | 1.884 | 1.423–2.494  | 1.748 | 1.317-2.320  |
| Dysphonia                                       | 13 (6.0)         | 168 (4.2)          | 1.437 | 0.809-2.555  | 1.340 | 0.751-2.392  |
| Hoarseness                                      | -                | 27 (0.7)           | -     | -            | -     | -            |
| Hypophonia                                      | 1 (0.5)          | 4 (0.1)            | 4.599 | 0.513-41.265 | 6.883 | 0.731-64.832 |
| <b>Airway</b>                                   | <b>16 (4.8)</b>  | <b>588 (9.6)</b>   | 0.474 | 0.285-0.789  | 0.450 | 0.270-0.750  |
| Supraglottic/glottic/posterior glottic stenosis | -                | 109 (2.7)          | -     | -            | -     | -            |
| Subglottic/tracheal stenosis                    | 2 (0.9)          | 196 (4.9)          | 0.181 | 0.045-0.734  | 0.163 | 0.040-0.659  |
| Tracheostomy                                    | 2 (0.9)          | 137 (3.4)          | 0.264 | 0.065-1.069  | 0.280 | 0.069-1.140  |
| Tracheomalacia                                  | 1 (0.5)          | 30 (0.7)           | 0.611 | 0.083-4.491  | 0.577 | 0.078-4.282  |
| Shortness of breath                             | 3 (1.4)          | 54 (1.3)           | 1.020 | 0.317-3.279  | 0.905 | 0.280-2.924  |
| Paradoxical VC motion                           | 8 (3.7)          | 60 (1.5)           | 2.483 | 1.177-5.236  | 2.364 | 1.110-5.032  |
| <b>Swallowing</b>                               | <b>75 (22.8)</b> | <b>1336 (22.1)</b> | 1.035 | 0.795-1.348  | 1.045 | 0.801-1.364  |
| Laryngopharyngeal reflux disease                | 48 (22.3)        | 728 (18.0)         | 1.246 | 0.909-1.708  | 1.238 | 0.900-1.703  |
| Dysphagia                                       | 25 (11.6)        | 493 (12.2)         | 0.923 | 0.608-1.402  | 0.927 | 0.608-1.414  |
| Cricopharyngeal Hypertrophy                     | -                | 19 (0.5)           | -     | -            | -     | -            |
| Aspiration                                      | -                | 8 (0.2)            | -     | -            | -     | -            |
| Esophageal stricture                            | -                | 26 (0.6)           | -     | -            | -     | -            |
| Esophageal perforation                          | -                | 1 (0.0)            | -     | -            | -     | -            |
| Esophageal dysmotility                          | 1 (0.5)          | 20 (0.5)           | 0.966 | 0.129-7.237  | 0.882 | 0.116-6.676  |
| Zenker's                                        | 1 (0.5)          | 35 (0.9)           | 0.523 | 0.071-3.829  | 0.568 | 0.077-4.213  |
| Eosinophilic esophagitis                        | -                | 6 (0.1)            | -     | -            | -     | -            |
| <b>Other</b>                                    | <b>55 (16.7)</b> | <b>969 (16.0)</b>  | 1.057 | 0.792-1.412  | 1.076 | 0.804-1.440  |
| Chronic cough                                   | 28 (13.0)        | 401 (9.9)          | 1.304 | 0.874-1.945  | 1.192 | 0.796-1.783  |
| Sinusal                                         | 8 (3.7)          | 199 (4.9)          | 0.731 | 0.358-1.496  | 0.825 | 0.401-1.695  |
| H+N Cancer                                      | 1 (0.5)          | 72 (1.8)           | 0.249 | 0.035-1.798  | 0.292 | 0.040-2.118  |

#Adjusted for age and gender +Percentage of all diagnoses in the group ++Percentage of patients in the group having the diagnosis  
Abbreviations: VC – vocal cord, H+N – head and neck

**eTable 2.** Odds of Voice Laryngeal Disorders in Patients With Fibromyalgia vs Control Group

| Diagnosis                         | Fibromyalgia group (77)      | Control group (4172) | Unadjusted OR | 95% CI       | Adjusted OR <sup>#</sup> | 95% CI       |
|-----------------------------------|------------------------------|----------------------|---------------|--------------|--------------------------|--------------|
| <b>Vocal folds pathology</b>      | <b>40 (31.7)<sup>+</sup></b> | <b>2304 (36.5)</b>   | 0.811         | 0.555-1.184  | 0.871                    | 0.594-1.275  |
| VC cancer                         | 1 (0.8) <sup>++</sup>        | 151 (2.4)            | 0.327         | 0.045-2.354  | 0.525                    | 0.072-3.826  |
| VC paralysis                      | 3 (2.4)                      | 464 (7.3)            | 0.308         | 0.098-0.971  | 0.300                    | 0.095-0.949  |
| Inflammatory VC lesion            | 2 (1.6)                      | 21 (0.3)             | 4.837         | 1.122-20.855 | 4.219                    | 0.966-18.430 |
| Ulcerative Laryngitis             | 2 (1.6)                      | 31 (0.5)             | 0.306         | 0.072-1.291  | 3.166                    | 0.740-13.550 |
| <b>Functional Voice disorders</b> | <b>37 (29.4)</b>             | <b>951 (15.0)</b>    | 2.347         | 1.590-3.464  | 2.131                    | 1.440-3.153  |
| Muscle Tension Dysphonia          | 30 (23.8)                    | 745 (11.8)           | 2.338         | 1.541-3.548  | 2.125                    | 1.397-3.232  |
| Dysphonia                         | 7 (5.6)                      | 174 (2.8)            | 2.077         | 0.955-4.518  | 1.912                    | 0.875-4.176  |
| <b>Airway</b>                     | <b>7 (5.6)</b>               | <b>597 (9.4)</b>     | 0.564         | 0.262-1.214  | 0.524                    | 0.243-1.132  |
| Paradoxical VC motion             | 4 (3.2)                      | 64 (1.0)             | 3.204         | 1.149-8.939  | 2.904                    | 1.030-8.187  |
| <b>Swallowing</b>                 | <b>23 (18.3)</b>             | <b>1392 (22.0)</b>   | 0.790         | 0.501-1.247  | 0.799                    | 0.506-1.263  |
| <b>Other</b>                      | <b>19 (15.1)</b>             | <b>1074 (17.0)</b>   | 0.867         | 0.530-1.419  | 0.871                    | 0.531-1.429  |
| Chronic cough                     | 11 (8.7)                     | 419 (6.6)            | 1.347         | 0.720-2.520  | 1.216                    | 0.648-2.283  |

<sup>#</sup>Adjusted for age and gender <sup>+</sup>Percentage of all diagnoses in the group <sup>++</sup>Percentage of patients in the group having the diagnosis Abbreviations: VC – vocal cord

**eTable 3.** Odds of Voice Laryngeal Disorders in Patients With Irritable Bowel Syndrome vs Control Group

| Diagnosis                                       | IBS group (80)               | Control group (4169) | Unadjusted OR | 95% CI        | Adjusted OR <sup>#</sup> | 95% CI        |
|-------------------------------------------------|------------------------------|----------------------|---------------|---------------|--------------------------|---------------|
| <b>Vocal folds pathology</b>                    | <b>32 (33.0)<sup>+</sup></b> | <b>2312 (36.4)</b>   | 0.859         | 0.561-1.316   | 0.895                    | 0.583-1.375   |
| VC cancer                                       | 0 (0.0) <sup>++</sup>        | 152 (2.4)            | -             | -             | -                        | -             |
| VC granuloma                                    | 4 (4.1)                      | 102 (1.6)            | 2.634         | 0.950-7.302   | 3.469                    | 1.236-9.739   |
| VC paralysis                                    | 3 (3.1)                      | 464 (7.3)            | 0.405         | 0.128-1.282   | 0.394                    | 0.124-1.250   |
| Laryngocele                                     | 1 (1.0)                      | 3 (0.0)              | 22.931        | 2.271-213.704 | 19.350                   | 1.938-193.298 |
| <b>Functional Voice disorders</b>               | <b>18 (18.6)</b>             | <b>970 (15.3)</b>    | 1.263         | 0.754-2.117   | 1.176                    | 0.700-1.974   |
| Muscle Tension Dysphonia                        | 15 (15.5)                    | 760 (12.0)           | 1.345         | 0.772-2.344   | 1.253                    | 0.718-2.188   |
| Spasmodic Dysphonia                             | 3 (3.1)                      | 95 (1.5)             | 2.101         | 0.654-6.750   | 1.778                    | 0.550-5.750   |
| <b>Airway</b>                                   | <b>6 (6.2)</b>               | <b>598 (9.4)</b>     | 0.634         | 0.276-1.454   | 0.609                    | 0.265-1.400   |
| Supraglottic/glottic/posterior glottic stenosis | 0 (0.0)                      | 109 (1.7)            | -             | -             | -                        | -             |
| Subglottic/tracheal stenosis                    | 0 (0.0)                      | 199 (3.1)            | -             | -             | -                        | -             |
| Tracheostomy                                    | 0 (0.0)                      | 139 (2.2)            | -             | -             | -                        | -             |
| Paradoxical VC motion                           | 4 (4.1)                      | 64 (1.0)             | 4.223         | 1.507-11.837  | 4.039                    | 1.428-11.426  |
| <b>Swallowing</b>                               | <b>21 (21.6)</b>             | <b>1394 (22.0)</b>   | 0.982         | 0.603-1.598   | 0.990                    | 0.608-1.612   |
| <b>Other</b>                                    | <b>20 (20.6)</b>             | <b>1073 (16.9)</b>   | 1.277         | 0.777-2.097   | 1.296                    | 0.788-2.133   |

<sup>#</sup>Adjusted for age and gender <sup>+</sup>Percentage of all diagnoses in the group <sup>++</sup>Percentage of patients in the group having the diagnosis  
Abbreviations: VC – vocal cord,

**eTable 4.** Odds of Voice Laryngeal Disorders in Patients With Chronic Fatigue Syndrome vs Control Group

| Diagnosis                                       | Chronic fatigue group (70)   | Control group (4179) | Unadjusted OR | 95% CI      | Adjusted OR <sup>#</sup> | 95% CI      |
|-------------------------------------------------|------------------------------|----------------------|---------------|-------------|--------------------------|-------------|
| <b>Vocal folds pathology</b>                    | <b>31 (29.0)<sup>+</sup></b> | <b>2313 (36.5)</b>   | 0.710         | 0.466-1.081 | 0.720                    | 0.471-1.100 |
| VC cancer                                       | 1 (0.9) <sup>++</sup>        | 151 (2.4)            | 0.387         | 0.054-2.788 | 0.470                    | 0.064-3.421 |
| VC paresis                                      | 6 (5.6)                      | 168 (2.7)            | 2.182         | 0.944-5.042 | 2.323                    | 1.002-5.389 |
| <b>Functional Voice disorders</b>               | <b>23 (21.5)</b>             | <b>965 (15.2)</b>    | 1.525         | 0.956-2.430 | 1.434                    | 0.898-2.291 |
| Muscle Tension Dysphonia                        | 19 (17.8)                    | 756 (11.9)           | 1.594         | 0.965-2.633 | 1.502                    | 0.908-2.486 |
| <b>Airway</b>                                   | <b>3 (2.8)</b>               | <b>601 (9.5)</b>     | 0.275         | 0.087-0.870 | 0.270                    | 0.085-0.854 |
| Supraglottic/glottic/posterior glottic stenosis | 0 (0.0)                      | 109 (1.7)            | -             | -           | -                        | -           |
| Subglottic/tracheal stenosis                    | 1 (0.9)                      | 198 (3.1)            | 0.293         | 0.041-2.107 | 0.276                    | 0.038-1.993 |
| <b>Swallowing</b>                               | <b>30 (28.0)</b>             | <b>1385 (21.9)</b>   | 1.393         | 0.910-2.133 | 1.403                    | 0.915-2.149 |
| Laryngopharyngeal reflux disease                | 18 (16.8)                    | 758 (12.0)           | 1.489         | 0.892-2.485 | 1.517                    | 0.906-2.540 |
| Dysphagia                                       | 11 (10.3)                    | 508 (8.0)            | 1.315         | 0.700-2.470 | 1.290                    | 0.684-2.432 |
| <b>Other</b>                                    | <b>20 (18.7)</b>             | <b>1073 (16.9)</b>   | 1.128         | 0.691-1.842 | 1.163                    | 0.711-1.903 |

<sup>#</sup>Adjusted for age and gender <sup>+</sup>Percentage of all diagnoses in the group <sup>++</sup>Percentage of patients in the group having the diagnosis  
Abbreviations: VC – vocal cord,
